# Supplementary material for: Examination of aggregation-induced enhanced emission in a propeller-shaped chiral nonconjugated blue emitter from restricted intramolecular rotation and J-type π⋯π stacking interactions
Source: Royal Society of Chemistry journal article supplement (doi:10.1039/d0cp06690g), 2021-01-01
Supplement: d0cp06690g1.pdf [file d0cp06690g1.pdf]

**Examination of Aggregation Induced Enhanced Emission in a Propeller  
Shaped Chiral- Nonconjugated Blue Emitter from Restricted  
Intramolecular Rotation and *J Type*  $\pi \cdots \pi$  Stacking Interactions**

Gül Yakalı<sup>†,\*</sup>

<sup>†</sup>Department of Engineering Sciences, Faculty of Engineering, Izmir Katip Celebi University, Cigli, 35620 Izmir,  
Turkey

## Table of Figures

### Page No

|                                                                                                                                                                |   |
|----------------------------------------------------------------------------------------------------------------------------------------------------------------|---|
| Figure S1. Thermogravimetric analysis of the compound.....                                                                                                     | 3 |
| Figure S2. Cyclic voltammogram of the compound recorded in 0.1 M TBAPF <sub>6</sub> in dichloromethane solution at a scan rate of 100 mV s <sup>-1</sup> ..... | 4 |
| Figure S3. The PLQY results of the molecule in solid and solution state.....                                                                                   | 4 |
| Table S1. The crystallographic details of the compound.....                                                                                                    | 5 |
| Table S2. Selected geometric parameters obtained from SCXRD for the compound.....                                                                              | 6 |
| Table S3. Detailed interactions geometry of the compound.....                                                                                                  | 6 |
| Table S4. Crystallographic stacking data of the compound.....                                                                                                  | 7 |
| Table S5. Electronic properties of the compound.....                                                                                                           | 7 |

## 1. Thermogravimetric Analysis

According to thermogravimetric analysis (Figure S1), thermal decomposition onset and offset temperature of the molecule was measured approximately at 200 °C and 305 °C, respectively. Maximum degradation temperature and maximum degradation rate of the molecule were at 300°C and approximately 2.5%/°C, respectively. The molecule has single and clear degradation step like pure organic samples. According to DTG thermogram, at 98°C weight change could be melting point of the molecule. Weight loss of samples at 600°C, under nitrogen atmosphere were measured as %98.7 that residue of sample does not contain any inorganic impurities like catalyst.

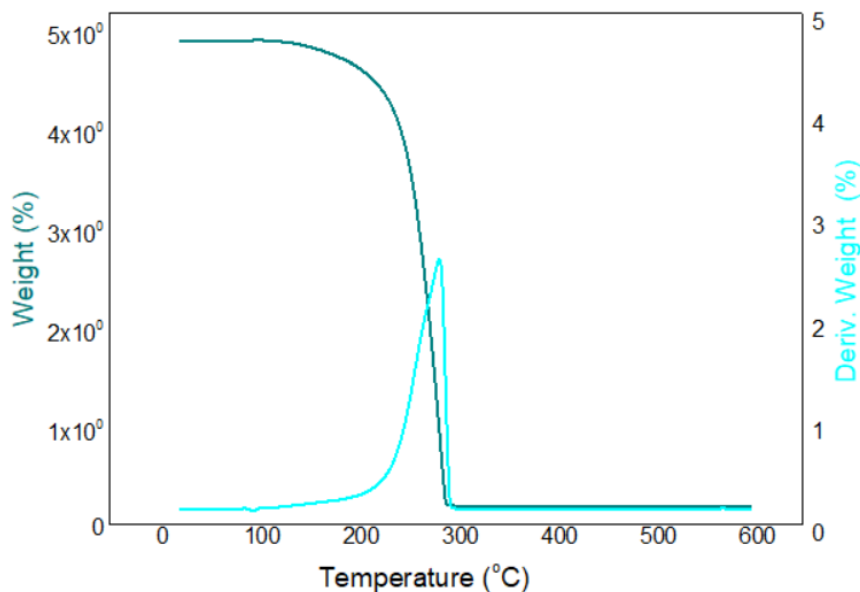

Figure S1. TGA (green) and DTG (blue) curves of the molecule.

## 3.6 Electrochemical Studies of the Molecule

To understand the electrochemical properties of the molecule, the cyclic voltammetry (CV) analysis (Figure S2) was performed in tetrabutylammonium hexafluorophosphate supporting electrolyte at room temperature. In this study, counter, reference and working electrode are platinum wire, silver wire and glassy-carbon electrodes, respectively. The onset oxidation ( $E_{ox}^{onset}$ ), reduction ( $E_{red}^{onset}$ ), HOMO, LUMO and  $E_{gap}$  values of the molecule were calculated from the CV curves and are given in Table S5. The HOMO and LUMO energy level of the molecule were estimated as -6.0 eV and -1.90 eV, respectively. The LUMO energy level of the molecule was determined by using its optical band gap ( $E_g^{opt}$ ). One of the most common approaches used in the determination of the optical band gap of semiconductors in literature is the wavelength corresponding to the maximum absorption band edge<sup>58,59</sup>. The optical band gap of the molecule is 4.1 eV. All results were obtained from the given equations. These results show that the theoretical results are in good agreement with the experimental electrochemical studies.

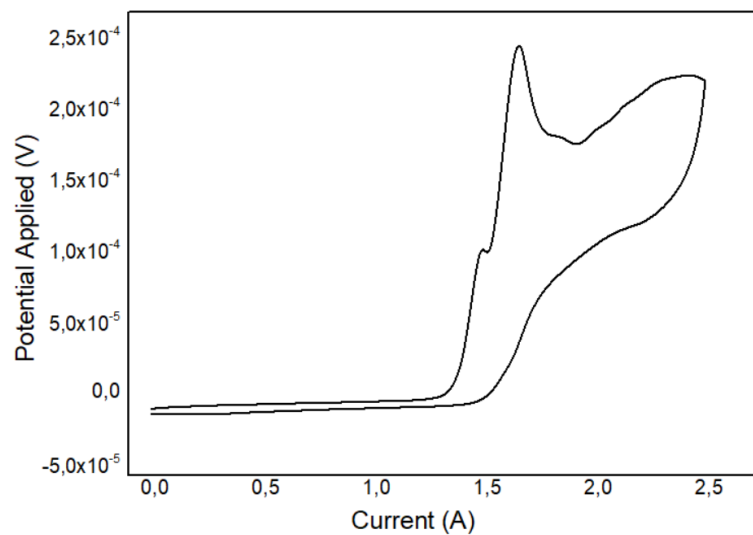

**Figure S2.** Cyclic voltammograms of the compound: working electrode, glassy carbon; auxiliary electrode, Pt wire; reference electrode, Ag wire.

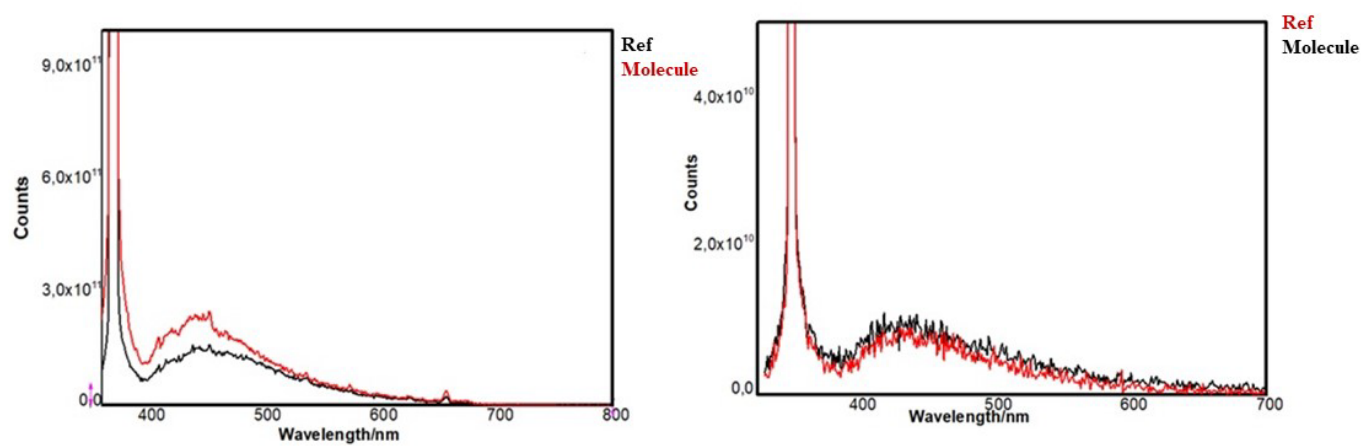

**Figure S3.** Solution (left) and solid phase (right) PLQY results of the molecule.

**Table S1.** Crystallographic details for the compound.

| <b>Crystal Data</b>                         |                                                                  |
|---------------------------------------------|------------------------------------------------------------------|
| Empirical Formula                           | C <sub>22</sub> H <sub>20</sub> O <sub>2</sub> S                 |
| Formula Weight (g/mol)                      | 348.47                                                           |
| Cell setting / Space group                  | monoclinic/ P2 <sub>1</sub> /c                                   |
| Unit cell dimensions (Å, °)                 | a= 18.7765(12)<br>b= 5.7331(4)<br>c= 17.6642(10)<br>β=107.791(7) |
| Unit cell volume ( Å <sup>3</sup> )         | 1810.6(2)                                                        |
| Temperature (K)                             | 298 (2)                                                          |
| Absorption coefficient ( mm <sup>-1</sup> ) | 0.191                                                            |
| Z / Density [g/cm <sup>3</sup> ]            | 4/ 1.2783                                                        |
| F(000)                                      | 736.8                                                            |
| Crystal size (mm <sup>3</sup> )             | 0.512 × 0.283 × 0.218                                            |
| 2θ range (°)                                | 6.48-52.74                                                       |
| h range                                     | <b>-23 → 18</b>                                                  |
| k range                                     | <b>-3 → 7</b>                                                    |
| l range                                     | <b>-22 → 18</b>                                                  |
| Reflections collected / unique              | 6146/3674                                                        |
| Data / restraints / parameters              | 3674/0/227                                                       |
| Goodness-of-fit on F <sup>2</sup>           | 1.034                                                            |
| Final R indices [I > 2σ(I)]                 | R <sub>1</sub> = 0.0416<br>wR <sub>2</sub> = 0.0861              |
| R indices all data                          | R <sub>1</sub> = 0.0588<br>wR <sub>2</sub> = 0.0962              |
| Large diff. peak and hole                   | 0.35/-0.40                                                       |

**Table S2.** Selected interatomic distances (Å), angles and torsion angles (°) for the compound.

| Parameter                | Experimental | Theoretical |
|--------------------------|--------------|-------------|
| <u>Bond length (Å)</u>   |              |             |
| S1-C8                    | 1.8417(18)   | 1.874       |
| S1-C17                   | 1.7801(17)   | 1.796       |
| O1-C1                    | 1.430(2)     | 1.419       |
| O1-C2                    | 1.373(2)     | 1.363       |
| O2-C10                   | 1.217(2)     | 1.215       |
| C5-C8                    | 1.512(2)     | 1.513       |
| <u>Bond Angle (°)</u>    |              |             |
| C17-S1-C8                | 100.88(8)    | 101.878     |
| C2-O1-C1                 | 117.22(16)   | 118.485     |
| C9-C10-O2                | 121.34(17)   | 120.912     |
| O2-C10-C11               | 120.22(17)   | 120.424     |
| S1-C8-C5                 | 106.87(11)   | 107.307     |
| S1-C8-C9                 | 110.65(12)   | 111.469     |
| C5-C8-C9                 | 114.36(14)   | 113.925     |
| O1-C2-C7                 | 114.95(16)   | 115.862     |
| <u>Torsion Angle (°)</u> |              |             |
| S1-C8-C5-C4              | 74.50(18)    | 63.215      |
| C8-S1-C17-C18            | 103.29(15)   | 116.291     |
| C1-O1-C2-C3              | -1.7(3)      | -0.856      |
| O2-C10-C11-C16           | -161.21(18)  | -175.612    |

**Table S3.** Detailed interactions geometry of the compound. (Å , °)\*.

| Rings i-j                                  |                             | $R_c^a$     | $R1v^b$    | $R2v^c$    | $\alpha^d$ | $\beta^e$ | $\gamma^f$ | Symmetry         |
|--------------------------------------------|-----------------------------|-------------|------------|------------|------------|-----------|------------|------------------|
| Molecule                                   | Cg1...Cg3                   | 4.7688 (11) | -1.8445(7) | 4.4133(8)  | 50.19(9)   | 22.3      | 67.2       | x, 3/2-y, 1/2+z  |
|                                            | Cg2...Cg2                   | 4.1175(12)  | 3.4422(8)  | 3.4422(8)  | 0.03(10)   | 33.3      | 33.3       | 1-x, -1-y, 1-z   |
|                                            | Cg3...Cg1                   | 4.6210(10)  | 2.1719(8)  | -4.4506(7) | 50.19(9)   | 15.6      | 62         | x, 1/2-y, -1/2+z |
|                                            | Cg3...Cg2                   | 4.9930(12)  | 1.4286(8)  | 4.7652(8)  | 76.69(9)   | 17.4      | 73.4       | 1-x, 1-y, 1-z    |
| <b>C-H...<math>\pi</math> interactions</b> |                             |             |            |            |            |           |            |                  |
| Molecule                                   | X-H...Cg                    | H...Cg      | X-H...Cg   | X...Cg     |            |           |            |                  |
|                                            | C1-H1A...Cg1                | 2.922(9)    | 131.7(7)   | 3.632(2)   |            |           |            |                  |
|                                            | C21-H21...Cg1 <sup>ii</sup> | 2.953(2)    | 129.31(19) | 3.614(2)   |            |           |            |                  |

Cg1 is the centroid of (C2/C7); Cg2 is the centroids of (C11-C16); Cg3 is the centroid of (C17-C22)

<sup>a</sup> Centroid distance between ring i and ring j; <sup>b</sup> Vertical distance from ring centroid i to ring j; <sup>c</sup> Vertical distance from ring centroid j to ring i; <sup>d</sup> Dihedral angle between the first ring mean plane and the second ring mean plane of the partner molecule; <sup>e</sup> Angle between centroids of first ring and second ring mean planes; <sup>f</sup> Angle between the centroid of the first ring and the normal to the second ring mean plane of the partner molecule; <sup>g</sup> Distance between centroid of ring i and perpendicular projection of centroid of ring j on ring i.

**Table S4.** Crystallographic stacking data of the compound.

| Stacking parameters                      | Cg1...Cg3 | Cg2...Cg2 | Cg3...Cg1 | Cg3...Cg2 |
|------------------------------------------|-----------|-----------|-----------|-----------|
| Pitch angle (P:°)                        | 50.19     | 0.03      | 50.19     | 76.69     |
| Roll angle (R:°)                         | 67.2      | 33.3      | 62        | 73.4      |
| Pitch distance( $d_p$ : Å)               | 5.71      | 0.02      | 5.54      | 21.05     |
| Roll distance ( $d_r$ : Å)               | 11.3      | 2.70      | 8.68      | 16.7      |
| Slipping angle ( $\beta$ : °)            | 22.3      | 33.3      | 15.6      | 17.4      |
| Interplanar distance ( $d_{\pi\pi}$ : Å) | 4.76      | 4.11      | 4.62      | 4.99      |

**Table S5.** Electronic properties of the compound.

| Cyclic Voltammeter   |           | Absorption |                       | Theoretical Calculations |           |                 |
|----------------------|-----------|------------|-----------------------|--------------------------|-----------|-----------------|
| $E_{ox}^{onset}$ (V) | HOMO (eV) | LUMO (eV)  | Optical Band gap (eV) | HOMO (eV)                | LUMO (eV) | $\Delta E$ (eV) |
| 1.65                 | -6.0      | -1.90      | 4.1                   | -5.97                    | -1.76     | 4.15            |

$$I_p = -e(E_{1/2(ox,dye)} + 4.4) \text{ eV} \quad (1)$$

$$E_a = -e(E_{1/2(red,dye)} + 4.4) \text{ eV} \quad (2)$$

$$E_g = I_p - E_a \quad (3)$$

$$E_g^{opt} = \frac{1241}{\lambda(nm)} \quad (4)$$
